# Supplementary material for: Baseline Cardiovascular Characteristics of Adult Patients with Chronic Kidney Disease from the KoreaN Cohort Study for Outcomes in Patients With Chronic Kidney Disease (KNOW-CKD)
Source: PubMed Central journal article supplement — J Korean Med Sci. 2016 Dec 19;32(2):231–9. doi: 10.3346/jkms.2017.32.2.231 (PMC5219988; doi:10.3346/jkms.2017.32.2.231), 2016-12-19
Supplement: jkms-32-231-s001.pdf [file jkms-32-231-s001.pdf]

**Supplementary Table 1.** Baseline characteristics and prevalence of CVD according to 5 subcohorts

| Characteristics                  | Subcohort           |                   |                  |                   |                  | P value |
|----------------------------------|---------------------|-------------------|------------------|-------------------|------------------|---------|
|                                  | DN                  | HTN               | GN               | PKD               | Unclassified     |         |
| Participants                     | 519                 | 409               | 810              | 364               | 136              |         |
| Age, yr                          | 59.3 ± 9.4          | 59.6 ± 10.8       | 49.8 ± 12.1      | 46.9 ± 10.6       | 55.4 ± 13.0      | < 0.001 |
| Female                           | 162 (31.2)          | 114 (27.9)        | 359 (44.3)       | 180 (49.5)        | 54 (39.7)        | < 0.001 |
| Hypertension                     | 513 (99.8)          | 409 (100.0)       | 785 (96.9)       | 314 (86.3)        | 131 (96.3)       | < 0.001 |
| DM                               | 519 (100.0)         | 72 (17.6)         | 70 (8.6)         | 12 (3.3)          | 82 (60.3)        | < 0.001 |
| Current smoker                   | 84 (16.4)           | 71 (17.4)         | 115 (14.2)       | 55 (15.1)         | 24 (17.6)        | < 0.001 |
| Height, cm                       | 164.5 ± 8.2         | 164.8 ± 8.2       | 164.3 ± 8.2      | 166.1 ± 9.1       | 163.2 ± 8.1      | 0.003   |
| Weight, kg                       | 68.4 ± 11.4         | 68.4 ± 12.3       | 65.6 ± 11.7      | 65.2 ± 12.0       | 67.5 ± 12.1      | < 0.001 |
| BMI, kg/m <sup>2</sup>           | 25.2 ± 3.2          | 25.1 ± 3.5        | 24.2 ± 3.3       | 23.5 ± 3.0        | 25.3 ± 3.9       | < 0.001 |
| Waist-to-hip ratio               | 0.93 ± 0.06         | 0.91 ± 0.06       | 0.88 ± 0.07      | 0.88 ± 0.06       | 0.92 ± 0.06      | < 0.001 |
| SBP, mmHg                        | 134.3 ± 18.5        | 127.8 ± 15.9      | 123.4 ± 14.2     | 128.3 ± 13.3      | 130.3 ± 19.8     | < 0.001 |
| DBP, mmHg                        | 75.7 ± 11.7         | 77.7 ± 11.5       | 75.6 ± 10.1      | 81.0 ± 10.4       | 76.9 ± 13.2      | < 0.001 |
| CKD stages                       |                     |                   |                  |                   |                  | < 0.001 |
| Stage 1                          | 13 (2.5)            | 11 (2.7)          | 131 (16.2)       | 94 (25.8)         | 16 (11.8)        |         |
| Stage 2                          | 44 (8.5)            | 48 (11.7)         | 180 (22.2)       | 118 (32.4)        | 29 (21.3)        |         |
| Stage 3a                         | 72 (13.9)           | 95 (23.2)         | 163 (20.1)       | 52 (14.3)         | 21 (15.4)        |         |
| Stage 3b                         | 131 (25.2)          | 112 (27.4)        | 158 (19.5)       | 45 (12.4)         | 38 (27.9)        |         |
| Stage 4                          | 198 (38.2)          | 118 (28.9)        | 138 (17.0)       | 42 (11.5)         | 26 (19.1)        |         |
| Stage 5                          | 61 (11.8)           | 25 (6.1)          | 40 (4.9)         | 13 (3.6)          | 6 (4.4)          |         |
| CVD                              |                     |                   |                  |                   |                  |         |
| Any CVD                          | 130 (25.0)          | 88 (21.5)         | 56 (6.9)         | 25 (6.9)          | 22 (16.2)        | < 0.001 |
| Coronary disease                 | 60 (11.6)           | 32 (7.8)          | 14 (1.7)         | 2 (0.5)           | 10 (7.4)         | < 0.001 |
| MI                               | 18 (3.5)            | 9 (2.2)           | 6 (0.7)          | 1 (0.3)           | 2 (1.5)          | < 0.001 |
| Stroke                           | 51 (9.8)            | 38 (9.3)          | 19 (2.3)         | 21 (5.8)          | 6 (4.4)          | < 0.001 |
| PAD                              | 32 (6.2)            | 20 (4.9)          | 13 (1.6)         | 1 (0.3)           | 12 (8.8)         | < 0.001 |
| Arrhythmia                       | 16 (3.1)            | 18 (4.4)          | 18 (2.2)         | 2 (0.5)           | 2 (1.5)          | 0.040   |
| Urine ACR, mg/g                  |                     |                   |                  |                   |                  | < 0.001 |
| A1 (< 30)                        | 21 (4.3)            | 101 (26.1)        | 44 (5.8)         | 151 (42.9)        | 18 (13.2)        |         |
| A2 (30–300)                      | 101 (20.5)          | 126 (32.6)        | 214 (28.4)       | 169 (48.0)        | 41 (30.1)        |         |
| A3 (≥ 300)                       | 370 (75.2)          | 160 (41.3)        | 496 (65.8)       | 32 (9.1)          | 77 (56.6)        |         |
| Creatinine, mg/dL                | 2.4 ± 1.3           | 2.0 ± 1.2         | 1.6 ± 1.0        | 1.3 ± 0.9         | 1.7 ± 0.9        | < 0.001 |
| Cystatin C, mg/L                 | 2.3 ± 1.0           | 1.9 ± 0.9         | 1.6 ± 0.9        | 1.3 ± 0.7         | 1.5 ± 0.7        | < 0.001 |
| eGFR, mL/min/1.73 m <sup>2</sup> | 35.2 ± 20.6         | 40.8 ± 21.2       | 56.9 ± 31.8      | 68.1 ± 33.3       | 52.3 ± 30.1      | < 0.001 |
| Total cholesterol, mg/dL         | 178.9 ± 33.5        | 167.3 ± 43.7      | 169.3 ± 35.6     | 178.4 ± 39.0      | 176.7 ± 42.6     | < 0.001 |
| LDL cholesterol, mg/dL           | 91.0 ± 33.9         | 94.1 ± 30.8       | 100.1 ± 32.4     | 101.8 ± 27.1      | 96.2 ± 31.0      | < 0.001 |
| HDL cholesterol, mg/dL           | 43.6 ± 14.1         | 46.7 ± 14.1       | 51.5 ± 15.8      | 54.6 ± 14.0       | 51.0 ± 17.0      | < 0.001 |
| Hemoglobin, g/dL                 | 11.7 ± 1.8          | 13.3 ± 2.0        | 13.2 ± 1.9       | 13.2 ± 1.8        | 12.9 ± 2.2       | < 0.001 |
| Albumin, g/dL                    | 4.0 ± 0.5           | 4.3 ± 0.3         | 4.1 ± 0.4        | 4.4 ± 0.3         | 4.2 ± 0.5        | < 0.001 |
| Phosphorus, mg/dL                | 4.0 ± 0.8           | 3.6 ± 0.6         | 3.6 ± 0.6        | 3.6 ± 0.6         | 3.8 ± 0.6        | < 0.001 |
| Troponin T, ng/mL                | 0.029 ± 0.031       | 0.015 ± 0.015     | 0.010 ± 0.009    | 0.007 ± 0.004     | 0.030 ± 0.042    | < 0.001 |
| hsCRP, mg/L*                     | 0.7 (0.1–52.7)      | 0.8 (0–67.0)      | 0.5 (0–68.0)     | 0.4 (0–35.3)      | 1.1 (1.0–2.0)    | < 0.001 |
| Intact PTH, pg/mL*               | 63.4 (14.2–1,078.0) | 52.3 (19.1–660.3) | 44.4 (7.0–552.3) | 56.3 (21.8–414.9) | 42.7 (20.0–65.0) | < 0.001 |
| ARB                              | 419 (80.7)          | 318 (77.8)        | 669 (82.6)       | 270 (74.2)        | 109 (80.1)       | 0.025   |
| ACEi                             | 63 (12.1)           | 33 (8.1)          | 123 (15.2)       | 18 (4.9)          | 12 (8.8)         | < 0.001 |
| CCB                              | 295 (56.8)          | 218 (53.3)        | 216 (26.7)       | 120 (33.0)        | 57 (41.9)        | < 0.001 |
| Statin                           | 329 (63.4)          | 234 (57.2)        | 419 (51.7)       | 98 (26.9)         | 72 (52.9)        | < 0.001 |

Values are presented as number (%) or mean ± standard deviation.

CVD=cardiovascular disease, CKD=chronic kidney disease, DN=diabetic nephropathy, HTN=hypertensive nephropathy, GN=glomerulonephritis, PKD=polycystic kidney disease, BMI=body mass index, DM=diabetes mellitus, SBP=systolic blood pressure, DBP=diastolic blood pressure, MI=myocardial infarction, PAD=peripheral arterial disease, ACR=albumin-to-creatinine ratio, eGFR=estimated glomerular filtration rate, LDL=low-density lipoprotein, HDL=high-density lipoprotein, hsCRP=high-sensitive C-reactive protein, PTH=parathyroid hormone, ARB=angiotensin receptor blocker, ACEi=angiotensin converting enzyme inhibitor, CCB=calcium channel blocker.

\*Data are expressed as median and ranges (minimum to maximum).
